# Supplementary material for: Immune checkpoint regulator PD-L1 expression on tumor cells by contacting CD11b positive bone marrow derived stromal cells
Source: PubMed Central journal article supplement (PMC4353689; doi:10.1186/s12964-015-0093-y), 2015-02-27
Supplement: 12964_2015_93_MOESM1_ESM.pdf [file 12964_2015_93_MOESM1_ESM.pdf]

**Immune checkpoint regulator PD-L1 expression on tumor cells by contacting CD11b positive bone marrow derived stromal cells**

**Hyangsoon Noh <sup>1\*</sup>, Jiemiao Hu<sup>1\*</sup>, Xiaohong Wang<sup>2\*</sup>, Xueqing Xia <sup>1</sup>, Arun Satelli<sup>1</sup>, and Shulin Li<sup>1#</sup>**

## Supplemental S1

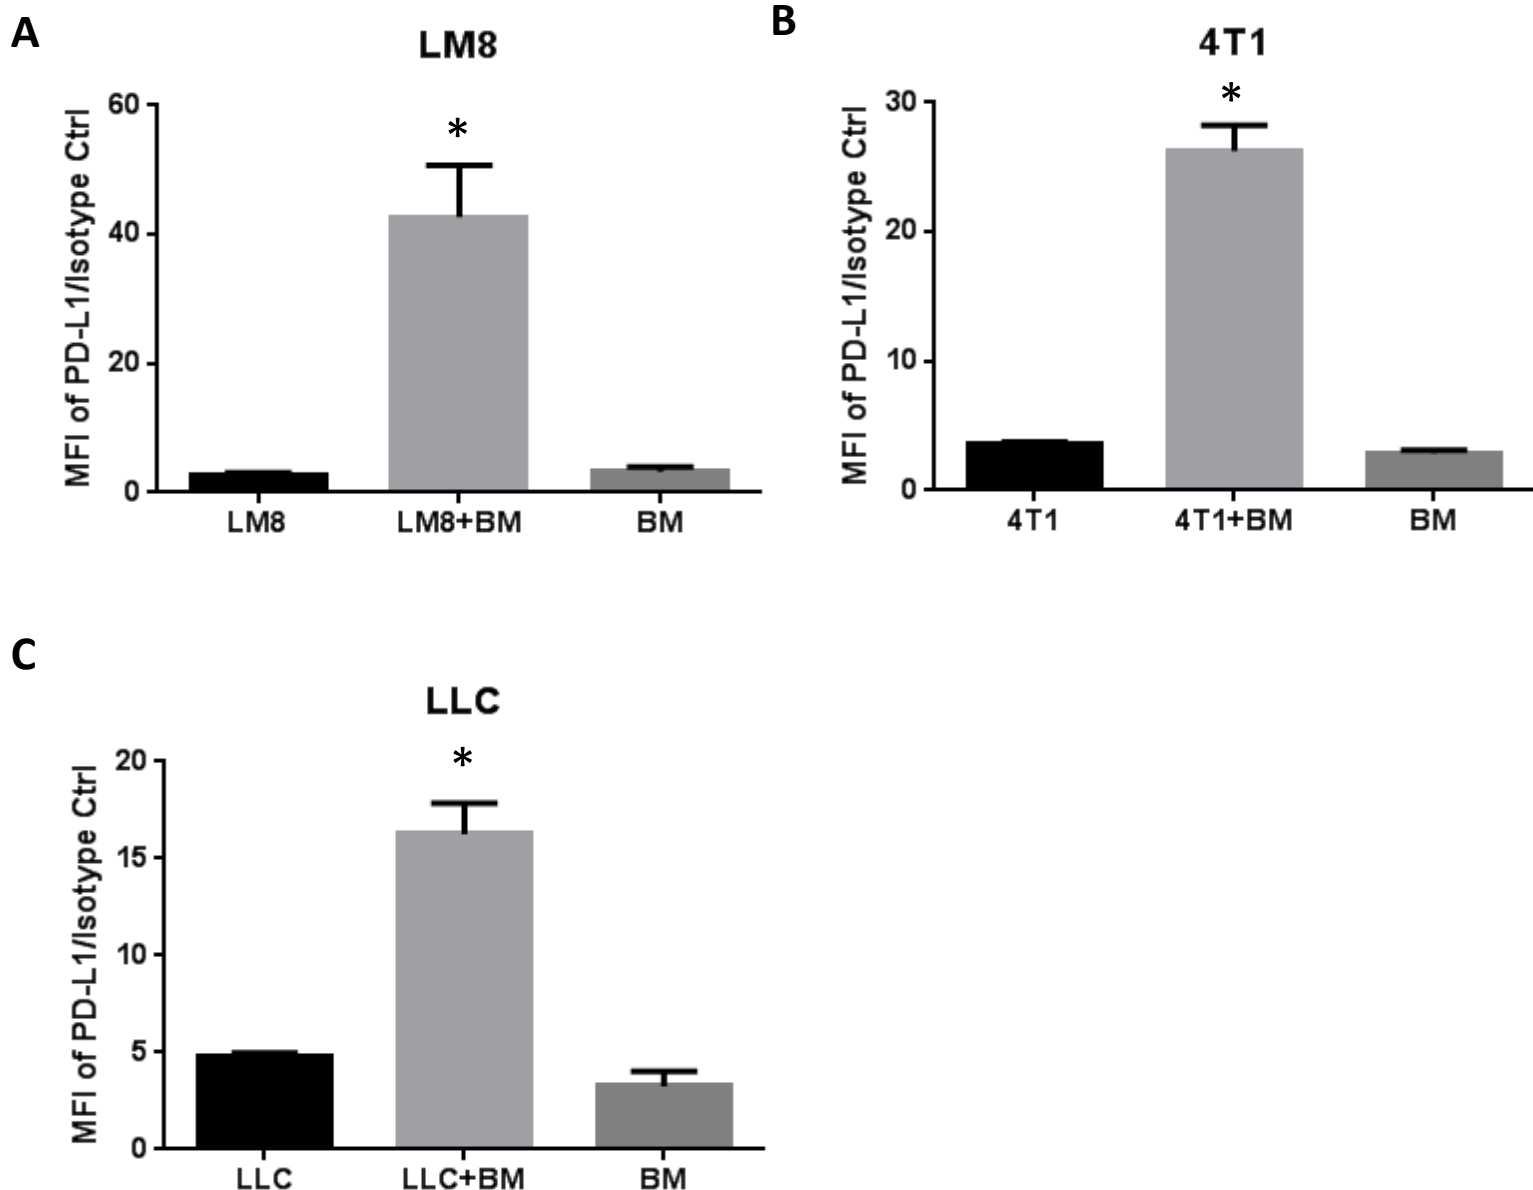

**S1. Bone Marrow cells induce PD-L1 expression on tumor cells.** (A) LM8, (B) 4T1, and (C) LLC tumor cell surface PD-L1 expression after co-culture with BM cells for 48hrs. Cells were stained with isotype control or PE-PD-L1 antibody. PD-L1 expression level was determined using flow cytometry. Data are presented as mean  $\pm$  standard error (n=3). \*,  $P < 0.05$  versus B16F10 alone, student *t* test.

## Supplemental S2

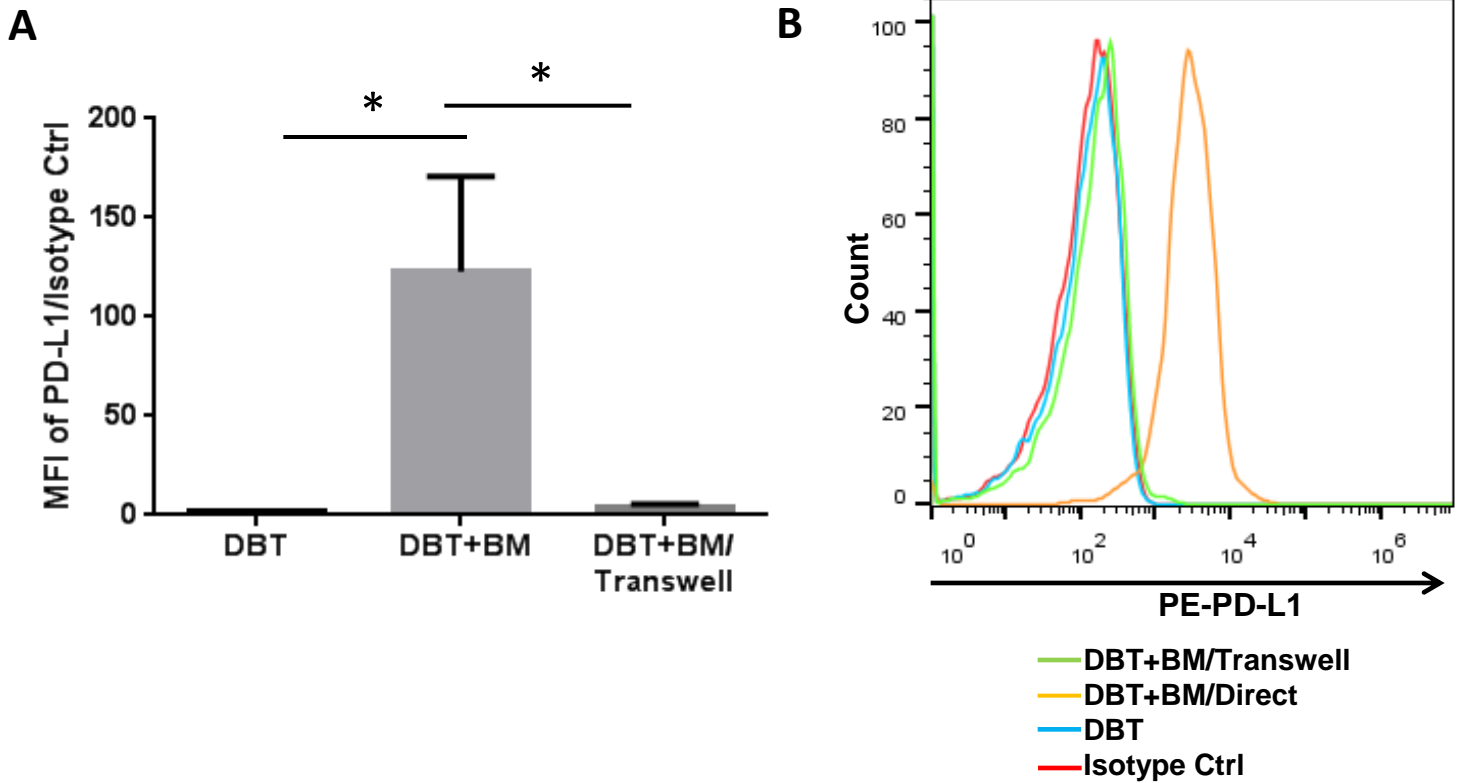

**S2. Direct interaction between BM and tumor cells is required for PD-L1 expression.** DBT brain tumor cells were co-cultured with BM cells together or separately using transwell membrane. Cells were stained with isotype control or PE-PD-L1 antibodies, followed flow cytometry analysis. (A) Bar graph, Data are presented as mean  $\pm$  standard error (n=3). (B) Histogram \*, P < 0.05 versus B16F10 alone, student *t* test.

## Supplemental S3

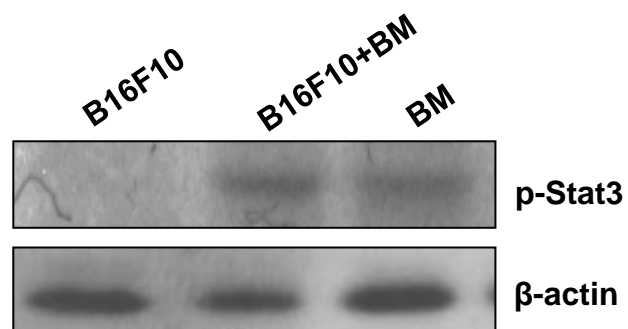

### **S3. pStat3 was not activated by BM co-culture in B16F10 cells.**

B16F10 cells co-cultured with BM cells were subjected to lysis, and cell lysates were subjected to immunoblotting to detect pStat3 levels. β-actin was used as a loading control.

## Supplemental S4

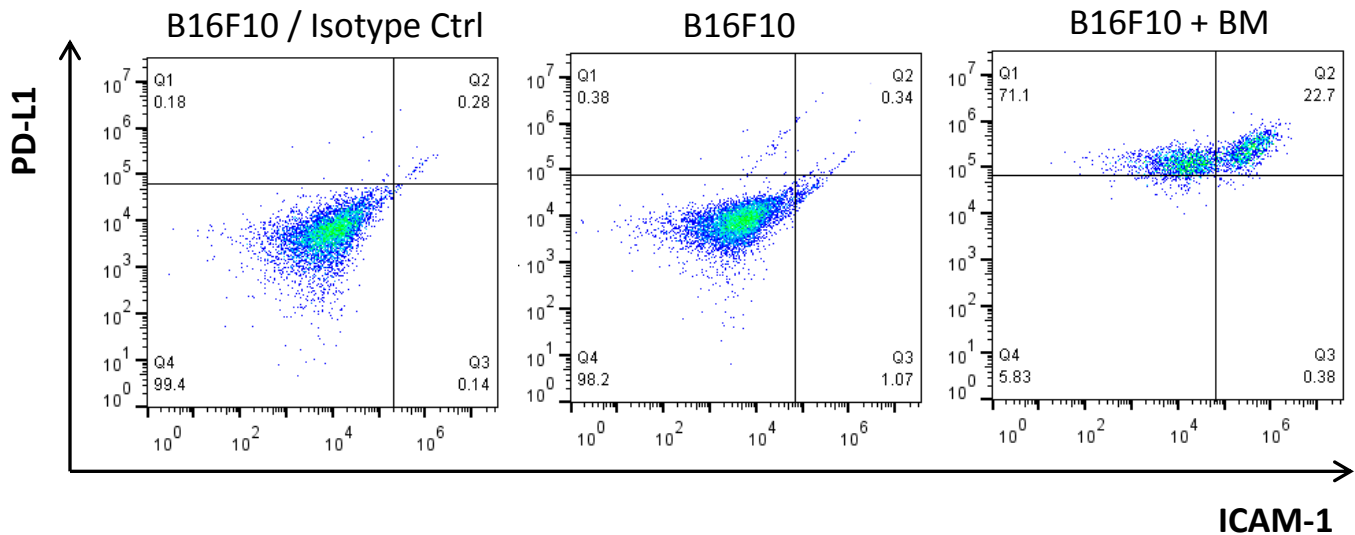

**S4. PD-L1 induction is not correlated with ICMA-1 on tumor cells.** B16F10 tumor cells were co-cultured with BM cells for 2 days. Cells were stained with isotype control, PE/Cy7-PD-L1 or PE-ICAM-1 antibodies, followed flow cytometry analysis. Results are representative of three independent experiments.
